# Supplementary material
Source: publisher figshare collection journal article supplement (https://geolsoc.figshare.com/ndownloader/files/28353131)
Supplement: Supplementary file 1 [file 28353131]

***Journal of the Geological Society***

**Supporting Information for**

# Three-phased Middle Permian–Mesozoic magmatism in the Great Xing'an Range implications for episodic southern subduction of the Mongol-Okhotsk ocean

Fei Yang a,b, Yinglei Li a, b*, Guang Wu a*, Huichuan Liu c, d,Gongzheng Chen a, Xiaolong Kang e, Yuling Bai a

a *MNR Key Laboratory of Metallogeny and Mineral Assessment, Institute of Mineral Resources, Chinese Academy of Geological Sciences, Beijing 100037, China;*

*b Key Laboratory of Orogen and Crust Evolution, School of Earth and Space Sciences, Peking University, Beijing 100871, China;*

*c. State Key Laboratory of Petroleum Resources and Prospecting, China University of Petroleum (Beijing), Beijing 102249, China;*

*d. College of Geosciences, China University of Petroleum (Beijing), Beijing 102249, China;*

*e Inner Mongolia Key Laboratory of Magmatic Mineralization and Ore-Prospecting, Geological Survey Institute of Inner Mongolia, Hohhot 010020, China.*

**Corresponding author:**

* Yinglei Li, Key Laboratory of Orogen and Crust Evolution, School of Earth and Space Sciences, Peking University, Beijing, 100871.

Tel: +86-18810658199, E-mail: cumtlyl@126.com

* Co corresponding author:

* Guang Wu, MNR Key Laboratory of Metallogeny and Mineral Assessment, Institute of Mineral Resources, Chinese Academy of Geological Sciences, Beijing 100037, China. E-mail address: tgzy2021@163.com (G. Wu).

**Contents of these files**

Analytical methods

Figures S1 to S3

**Introduction**

- Analytical methods
- Supplemental Fig. S1. (a–g) Harker diagrams for the Early Triassic to Early Cretaceous magmatic rocks in the Erguna Massif.
- Supplemental Fig. S2. (a) Cr versus Ni diagram (Liu et al., 2019a); (b) Rb/Sr vs Ba plot (Zhang et al., 2004).
- Supplemental Fig. S3. Tectonic discrimination diagrams involving (a) Ta versus Yb; (b) Nb vs Y; (c) Rb vs (Y + Nb) and (d) Rb vs (Yb + Ta) (Forster et al., 1997; Pearce et al., 1984); (e) Y (ppm) vs Cr (ppm) diagram (Pearce, 1982) (f) Nb/Yb versus Th/Yb diagram (Pearce, 2014); (g) Ti/100-Zr-Sr/2 diagram (Pearce and Cann, 1973); (h) Hf/3–Th–Ta (Wood, 1980).

### Analytical methods

### 1. Zircon U–Pb dating and In situ zircon Hf isotope analyses

Zircon grains were separated by a combination of heavy liquid and magnetic techniques, and were mounted in epoxy, then polished and coated with gold for cathodoluminescence (CL) imaging at Inner Mongolia Key Laboratory of Magmatic Mineralization and Ore-prospecting, Huhhot, China. All the zircon U–Pb dating analyses were conducted using an Agilent 7500c ICP-MS instrument coupled with a 193 nm ArFExcimer laser with the automatic positioning system at the Institute of Mineral Resources, Chinese Academy of Geological Sciences (CAGS). Zircon GJ‐1 and NIST 610 were used as the standard and optimize the machine, respectively. 32 μm spot size was selected for data collection, more detailed instrumental protocols and analytical procedures are similar to those described by (Hou et al., 2009; Yuan et al., 2004). The errors for individual U–Pb analyses are presented with 1σ error and uncertainties in grouped ages are quoted at 95% level (2σ). The ages were calculated and plotted using the Isoplot (ver 3.0) program (Ludwig, 2003), and common Pb was corrected following (Andersen, 2002).

In situ Hf isotopic analysis was conducted on a Neptune MC‐ICP‐MS, equipped with a 193 nm of laser ablation system at the Institute of Mineral Resources, Chinese Academy of Geological Sciences (CAGS). The spot size was 32 μm, the ablation time was 23 s, and the ablation rate was 8 Hz. The *ε*Hf(*t*) values were calculated using a 176Lu decay constant of 1.867 × 10–11 yr–1 , Present-day chondritic parameters 176Hf/177Hf = 0.282772 and 176Lu/177Hf = 0.0332 (Blichert-Toft and Albarède, 1997; Patchett et al., 2004). Two-stage model age (TDM2) are calculated for the source rocks by assuming a mean 176Lu/177Hf value of 0.015 for the average continental crust. The analytical procedures are described in detail by (Amelin et al., 2000; Griffin et al., 2002; Wu et al., 2007).

### 2. Major and trace element analyses

The major and trace element analyses were conducted at the Tianjin Geological Survey Center (China). We removed most of the almonds of our samples and then crushed the samples to 200‐mesh using an agate mill for whole‐rock elemental analyses. The major oxides were analysed by a wavelength X‐ray fluorescence spectrometry using fused glass disks according to the Chinese national standard (GB/T14506.14-2010). Trace element analyses were performed by an Agilent 7500a ICP-MS. Detailed sample preparation and analytical procedure followed (Zhang et al., 2018).

### 3. Whole-rock Sr-Nd isotope analyses

The whole‐rock Sr-Nd isotope composition analysis were determined by MAT262 thermal ionization mass spectrometry (TIMS) at the Sample Solution Analytical Technology Corporation, Wuhan, China. Mass fractionation corrections for Sr and Nd isotope ratios are based on 86Sr/88Sr and 146Nd/144Nd values of 0.1194 and 0.7219, respectively. 87Rb/87Sr and 143Sm/144Nd are calculated based on the contents of Rb, Sr, Sm, and Nd measured by ICP-MS in this study, respectively. The reported 87Sr/86Sr and 143Nd/144Nd ratios were adjusted to the NBS 987 standard 87Sr/86Sr = 0.71025 and the Shin Etsu Jndi-1 standard 143Nd/144Nd = 0.512115, the detailed analytical techniques are similar to those described by (Liu et al., 2019b; Wu et al., 2017).


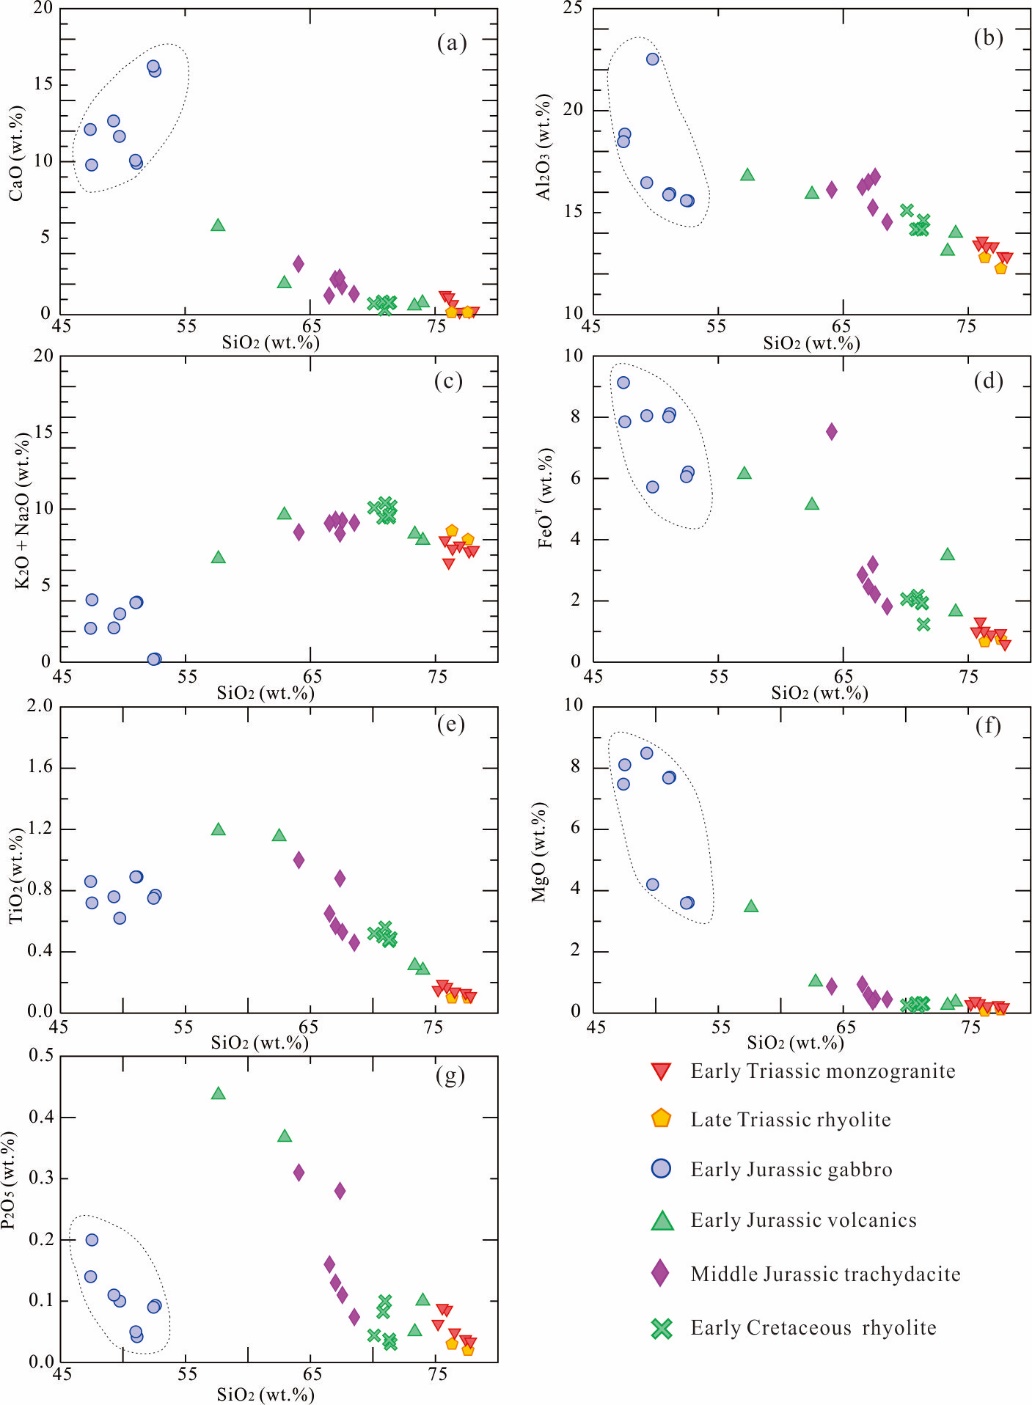
Supplemental Fig. S1. (a–g) Harker diagrams for the Early Triassic to Early Cretaceous magmatic rocks in the Erguna Massif.


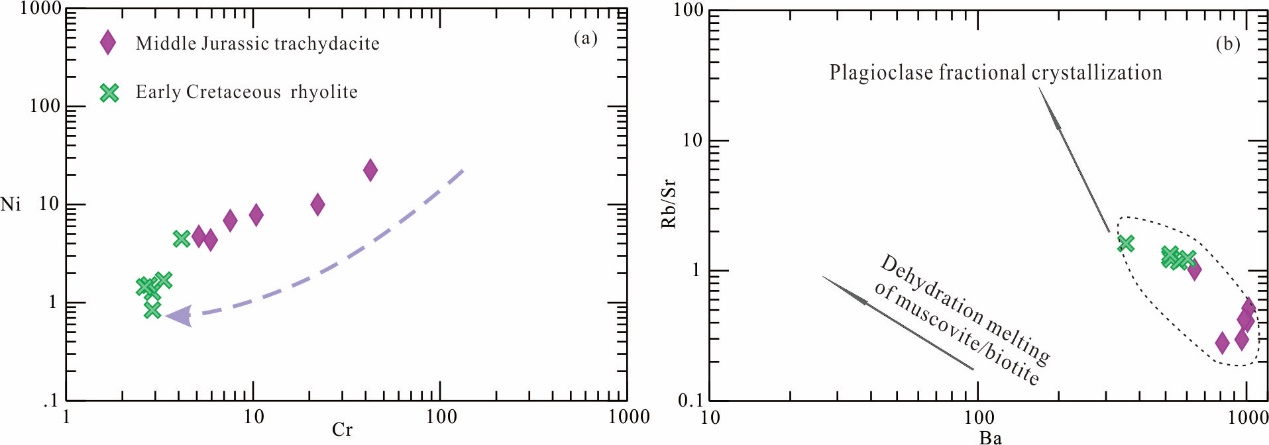


Supplemental Fig. S2. (a) Cr versus Ni diagram (Liu et al., 2019a); (b) Rb/Sr vs Ba plot (Zhang et al., 2004).


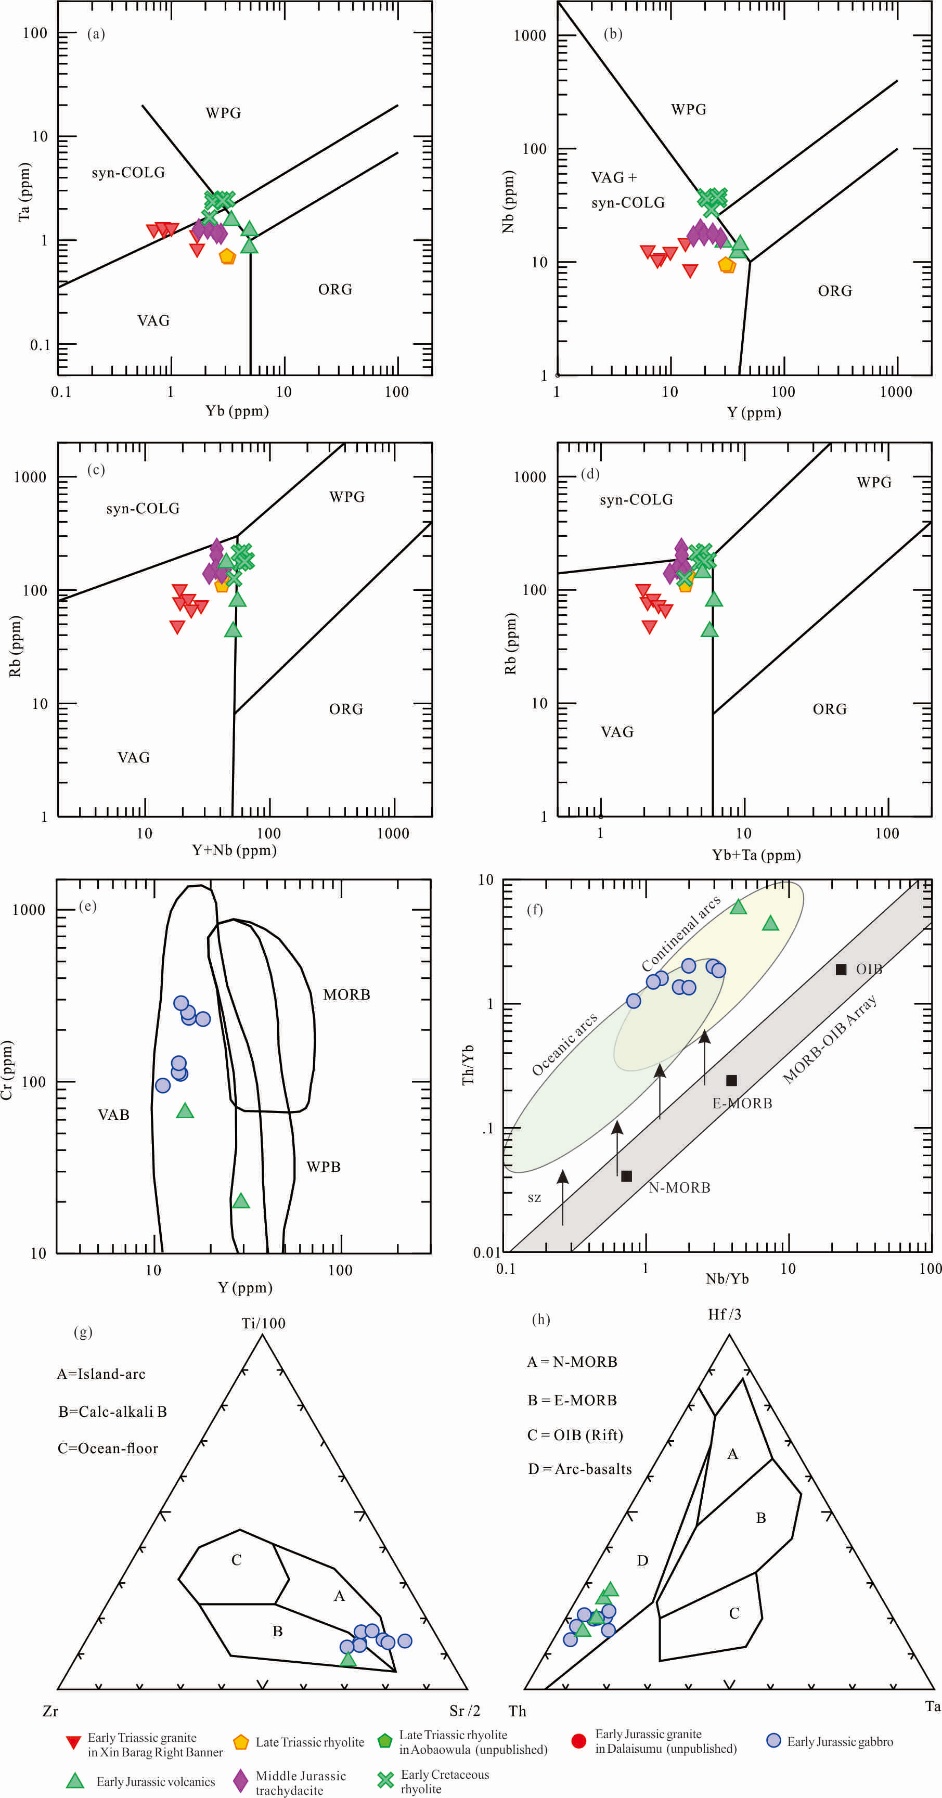


Supplemental Fig. S3. Tectonic discrimination diagrams involving (a) Ta versus Yb; (b) Nb vs Y; (c) Rb vs (Y + Nb) and (d) Rb vs (Yb + Ta) (Forster et al., 1997; Pearce et al., 1984); (e) Y (ppm) vs Cr (ppm) diagram (Pearce, 1982) (f) Nb/Yb versus Th/Yb diagram (Pearce, 2014); (g) Ti/100-Zr-Sr/2 diagram (Pearce and Cann, 1973); (h) Hf/3–Th–Ta (Wood, 1980).

### References

Amelin, Y., Lee, D.C., Halliday, A.N., 2000. Early-middle Archaean crustal evolution deduced from Lu-Hf and U-Pb isotopic studies of single zircon grains. Geochimica Et Cosmochimica Acta, 64(24): 4205-4225.

Andersen, T., 2002. Correction of common lead in U–Pb analyses that do not report 204Pb. Chemical Geology, 192(1): 59-79.

Blichert-Toft, J., Albarède, F., 1997. The Lu-Hf isotope geochemistry of chondrites and the evolution of the mantle-crust system. Earth and Planetary Science Letters, 148(1): 243-258.

Forster, H.J., Tischendorf, G., Trumbull, R.B., 1997. An evaluation of the Rb vs (Y+Nb) discrimination diagram to infer tectonic setting of silicic igneous rocks. Lithos, 40(2-4): 261-293.

Griffin, W.L., Wang, X., Jackson, S.E., Pearson, N.J., O'Reilly, S.Y., Xu, X.S., Zhou, X.M., 2002. Zircon chemistry and magma mixing, SE China: In-situ analysis of Hf isotopes, Tonglu and Pingtan igneous complexes. Lithos, 61(3-4): 237-269.

Hou, K.J., Li, Y.H., Tian, Y.R., 2009. In situ U-Pb zircon dating using laser ablation-multi ion counting-ICP-MS. Mineral Deposits, 28(4): 481-492.

Liu, H.C., Bi, M.W., Guo, X.F., Zhou, Y.Z., Wang, Y.K., 2019a. Petrogenesis of Late Silurian volcanism in SW Yunnan (China) and implications for the tectonic reconstruction of northern Gondwana. International Geology Review, 61(11): 1297-1312.

Liu, J.C., Wang, C., Liu, Y., Zhang, H.D., Ge, J.K., 2019b. Middle Permian Wuhaolai mafic complex in the northern North China Craton: Constraints on the subduction-related metasomatic mantle and tectonic implication. Geological Journal, 54(4): 1834-1852.

Ludwig, K.R., 2003. User's Manual for Isoplot 3.00 : A Geochronological Toolkit for Microsoft Excel. [Kenneth R. Ludwig?], Berkeley CA :.

Patchett, P.J., Vervoort, J.D., Söderlund, U., Salters, V.J.M., 2004. Lu–Hf and Sm–Nd isotopic systematics in chondrites and their constraints on the Lu–Hf properties of the Earth. Earth and Planetary Science Letters, 222(1): 29-41.

Pearce, J., 1982. Trace Element Characteristics of Lavas from Destructive Plate Boundaries, pp. 525-548.

Pearce, J.A., 2014. Immobile Element Fingerprinting of Ophiolites. Elements, 10(2): 101-108.

Pearce, J.A., Cann, J.R., 1973. Tectonic setting of basic volcanic rocks determined using trace element analyses. Earth and Planetary Science Letters, 19(2): 290-300.

Pearce, J.A., Harris, N.B.W., Tindle, A.G., 1984. Trace element discrimination diagrams for the tectonic interpretation of granitic rocks. Journal of Petrology, 25(4): 956-983.

Wood, D.A., 1980. The application of a ThHfTa diagram to problems of tectonomagmatic classification and to establishing the nature of crustal contamination of basaltic lavas of the British Tertiary Volcanic Province. Earth and Planetary Science Letters, 50(1): 11-30.

Wu, F.Y., Li, X.H., Zheng, Y.F., Gao, S., 2007. Lu-Hf isotopic systematics and their applications in petrology. Acta Geochimica Sinica(02): 185-220.

Wu, G., Li, X.Z., Xu, L.Q., Wang, G.R., Liu, J., Zhang, T., Quan, Z.X., Wu, H., Li, T.G., Zeng, Q.T., Chen, Y.C., 2017. Age, geochemistry, and Sr-Nd-Hf-Pb isotopes of the Caosiyao porphyry Mo deposit in Inner Mongolia, China. Ore Geology Reviews, 81: 706-727.

Yuan, H.L., Gao, S., Liu, X.M., Li, H.M., Günther, D., Wu, F.Y., 2004. Accurate U-Pb Age and Trace Element Determinations of Zircon by Laser Ablation-Inductively Coupled Plasma-Mass Spectrometry. Geostandards and Geoanalytical Research, 28(3): 353-370.

Zhang, H.F., Harris, N., Parrish, R., Kelley, S., Zhang, L., Rogers, N., Argles, T., King, J., 2004. Causes and consequences of protracted melting of the mid-crust exposed in the North Himalayan antiform. Earth and Planetary Science Letters, 228(1): 195-212.

Zhang, Y.T., Sun, F.Y., Wang, S., Xin, W., 2018. Geochronology and geochemistry of Late Jurassic to Early Cretaceous granitoids in the northern Great Xing'an Range, NE China: Petrogenesis and implications for late Mesozoic tectonic evolution. Lithos, 312: 171-185.
